# Supplementary material for: Caught between academic calling and academic pressure? Working time characteristics, time pressure and time sovereignty predict PhD students’ research engagement
Source: Springer Nature journal article supplement (doi:10.1007/s10734-023-01096-8), 2023-09-08
Supplement: 10734_2023_1096_MOESM1_ESM.pdf [file 10734_2023_1096_MOESM1_ESM.pdf]

## Appendix A

**Table A1.** Regression coefficients of path model by year of PhD survey (n<sub>2022</sub>=514, n<sub>2021</sub>=467, n<sub>2020</sub>=467)

|                                        | 2022     |             | 2021     |             | 2020     |             |
|----------------------------------------|----------|-------------|----------|-------------|----------|-------------|
|                                        | <i>b</i> | <i>sig.</i> | <i>b</i> | <i>sig.</i> | <i>b</i> | <i>sig.</i> |
| Engagement in PhD research ~           |          |             |          |             |          |             |
| Non-standard working hours             | .211     | ***         | .216     | ***         | .188     | ***         |
| Total working time                     | .162     | ***         | .159     | ***         | .086     | (*)         |
| Engagement in PhD research ~           |          |             |          |             |          |             |
| Experienced time pressure ~            | -.243    | ***         | -.234    | ***         | -.317    | ***         |
| Non-standard working hours             | .190     | ***         | .110     | *           | .262     | ***         |
| Share of non-research time             | .222     | ***         | .220     | ***         | .181     | ***         |
| Total working time                     | .135     | ***         | .077     | (*)         | .018     | n.s.        |
| Engagement in PhD research ~           |          |             |          |             |          |             |
| Experienced lack of time sovereignty ~ | -.135    | **          | -.104    | *           | -.009    | n.s.        |
| Non-standard working hours             | .157     | ***         | .191     | ***         | .153     | ***         |
| Share of non-research time             | .135     | ***         | .098     | *           | .124     | **          |
| Total working time                     | .231     | ***         | .030     | n.s.        | .093     | *           |
| <b>Controls</b>                        |          |             |          |             |          |             |
| Non-standard working hours ~           |          |             |          |             |          |             |
| Female                                 | -.048    | n.s.        | -.130    | **          | -.101    | *           |
| Teaching exceeds contractual hours     | .088     | *           | .036     | n.s.        | -.048    | n.s.        |
| Share of non-research time ~           |          |             |          |             |          |             |
| Teaching exceeds contractual hours     | .334     | ***         | .297     | ***         | .288     | ***         |
| Total working time ~                   |          |             |          |             |          |             |
| Female                                 | -.051    | n.s.        | -.079    | (*)         | -.106    | *           |
| Teaching exceeds contractual hours     | .168     | ***         | .090     | (*)         | .033     | n.s.        |
| <b>Goodness-of-Fit measures</b>        |          |             |          |             |          |             |
| Chi-square                             | 11.323   |             | 12.150   |             | 17.864   |             |
| df                                     | 10       |             | 10       |             | 10       |             |
| CFI                                    | .997     |             | .992     |             | .973     |             |
| RMSEA                                  | .016     |             | .021     |             | .041     |             |
| p-value close fit                      | .937     |             | .893     |             | .647     |             |
| SRMR                                   | .024     |             | .032     |             | .035     |             |
| R-square                               | .130     |             | .142     |             | .116     |             |

Notes. *b*=standardized regression coefficient, *sig.*=significance.

Levels of significance: \*\*\* $p \leq 0.001$ , \*\* $p \leq 0.01$ , \* $p \leq 0.05$ , (\*) $p \leq 0.10$ , n.s. not significant.
